# Supplementary material
Source: ML conference proceedings conference paper supplement (https://openaccess.thecvf.com/content/WACV2025/html/Fanelli_I_Dream_My_WACV_2025_paper.html)
Supplement: Supplementary file 1 [file Fanelli_I_Dream_My_WACV_2025_supplemental.pdf]

# I Dream My Painting: Connecting MLLMs and Diffusion Models via Prompt Generation for Text-Guided Multi-Mask Inpainting

## Supplementary Material

### 1. Additional Dataset Information

This section provides additional details on the automatically annotated dataset of digitized images of paintings from *ArtGraph*. As described in the main paper, the images were downloaded as thumbnails from the WikiArt API, using the formats *HalfHD*, *Large*, and *PinterestLarge*. For each image, we selected the highest resolution available. The counts and resolutions of the images are summarized in Table 1.

All 116,475 downloaded images were processed with Kosmos-2, generating grounded descriptions with bounding boxes around the primary objects depicted. After applying the size constraints detailed in the main paper, the dataset was refined to 102,276 images. We then used LLaVA to generate more detailed object-level descriptions for each object, limiting the descriptions to 40 tokens per object. Figure 2 illustrates two examples of images annotated using Kosmos-2 and LLaVA. As illustrated in the samples, automatically generated descriptions are inherently error-prone. However, in the main paper, we assessed their quality using CLIP, indicating that the alignment between the images and the generated texts remains acceptable. Caption errors may have had a greater impact on training the multi-mask inpainting diffusion model than on the MLLM used for prompt generation. This is because the original objects in the image are not directly involved in calculating the causal language modeling loss, which relies only on the text and the corrupted image input.

Additionally, we analyze the distribution of the number of masks per image both before (Fig. 3a) and after (Fig. 3b) applying a maximum limit of five objects for multi-mask inpainting, along with a global threshold on the covered area. We also present the distributions of the 50 most common objects, categorized by their respective noun chunks (Fig. 3c) and noun chunk roots (Fig. 3d), which were used to compute the prompt generation accuracy. These distributions reveal two long-tailed patterns, with a strong skew towards common concepts.

### 2. Additional Experiments

In this section, we present additional experiments that were not discussed in the main paper.

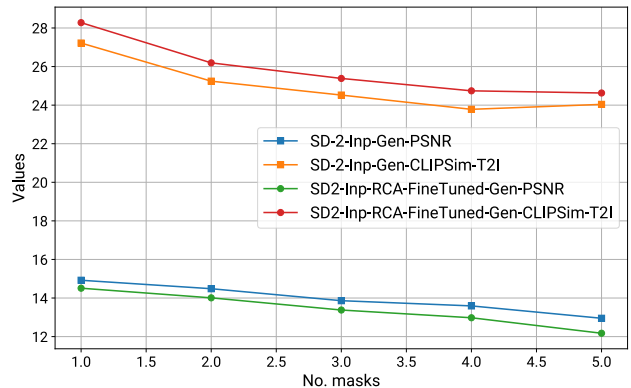

Figure 1. Comparative analysis on multi-mask inpainting.

### 2.1. Analysis on the Number of Masks

We compare the base Stable Diffusion-2-Inpainting model and our RCA fine-tuned version, using generated prompts to evaluate performance across varying numbers of masks (Fig. 1). The figure demonstrates that our method consistently achieves superior region-prompt alignment compared to the base Stable Diffusion model, regardless of the number of masks. Notably, at  $N = 5$ , the curves begin to converge, suggesting that multi-mask inpainting is particularly effective for cases with fewer masks ( $N \geq 1$ ). This could be because as the number of masks increases, the inpainting area expands, leading to more intersections between masks and longer prompts containing multiple sub-prompts. This complexity may reduce the precision of metric calculations, potentially diminishing the measurable advantages of RCA.

Regarding PSNR values, the base Stable Diffusion model consistently scores slightly higher. However, qual-

| Thumbnail name | Width | Height (max val.) | No. of images |
|----------------|-------|-------------------|---------------|
| HalfHD         | 1366  | 800               | 58744         |
| Large          | 750   | 600               | 31841         |
| PinterestLarge | 280   | 1120              | 25890         |

Table 1. Image thumbnail specifics for the 116,475 artwork in *ArtGraph*, downloaded from the WikiArt API.

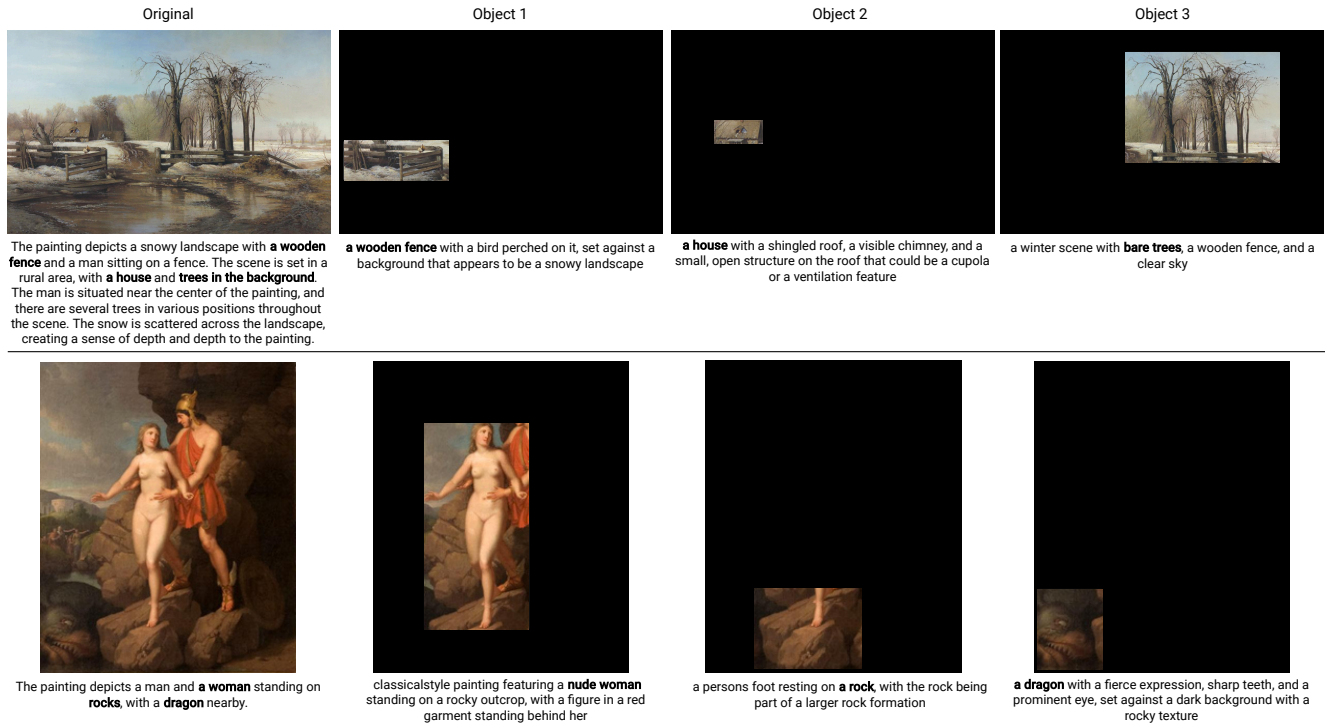

Figure 2. Automatically annotated samples from the art dataset. The first column displays the original images, along with the global grounded descriptions produced by Kosmos-2. Objects of valid sizes are shown in the other columns, with the rest of the image masked. These objects were cropped and provided to LLaVA to obtain the displayed object-level descriptions, which we used as training prompts. As demonstrated in the second example, certain masks can overlap. Our RCA implementation allows the intersection areas to attend to the prompts of both masks. Both samples present three valid masks.

itative assessments do not support the superiority of SD-2-Inp over RCA, indicating that PSNR can be influenced by various factors—such as the base model’s tendency to fill masked regions with common or background elements—potentially skewing its evaluation.

## 2.2. Domain Transfer

We conducted an additional experiment where we applied the weights learned from the automatically annotated art dataset to the photographic images in the DCI dataset.

As shown in Table 2, while the model trained directly on the DCI dataset achieves higher scores in LPIPS and text-to-image CLIPSim relative to the ground truth annotations, it is slightly outperformed in PSNR and significantly

|              | L ↓          | P ↑          | Q ↑          | C ↑          |
|--------------|--------------|--------------|--------------|--------------|
| DCI pipeline | <b>30.26</b> | 12.16        | 74.56        | <b>23.66</b> |
| Art pipeline | 30.69        | <b>12.26</b> | <b>80.25</b> | 23.00        |

Table 2. Comparative results on DCI between the dataset-specific pipeline and the pipeline transferred from the art domain (P: PSNR; L: LPIPS; Q: CLIP-IQA; C: CLIPSim-T2I).

in CLIP-IQA. This latter result suggests that training on the art domain and testing on photographic images can lead to higher-quality outputs in certain metrics.

We analyzed the qualitative results shown in Fig. 4 to better understand these outcomes. These examples illustrate that the model trained on the art dataset tends to apply stylistic features in its completions, often generating inpainted objects reminiscent of paintings from previous centuries, similar to those found in the WikiArt collection. This results in more colorful and aesthetically appealing completions. However, the generated objects are typically less precise, and the overall inpainting shows more artifacts compared to those generated for purely artistic images. This observation indicates that transferring generative capabilities between different domains remains a promising area for further research.

## 3. Region-Aligned CLIPSim Computation

As detailed in the main paper, we adopt the approach proposed by Lüddecke and Ecker in their work on text-guided segmentation [1] to calculate the CLIP similarity between a regional prompt and the corresponding output. In Fig. 5, we visualize how this method is employed as a met-

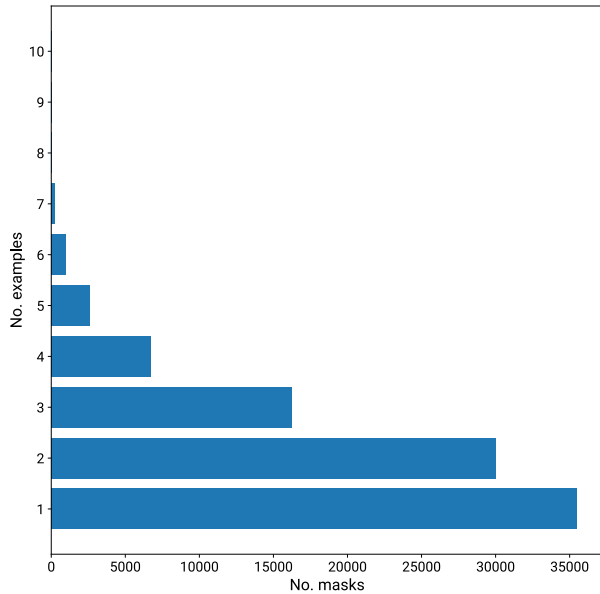

(a) No. of masks per example.

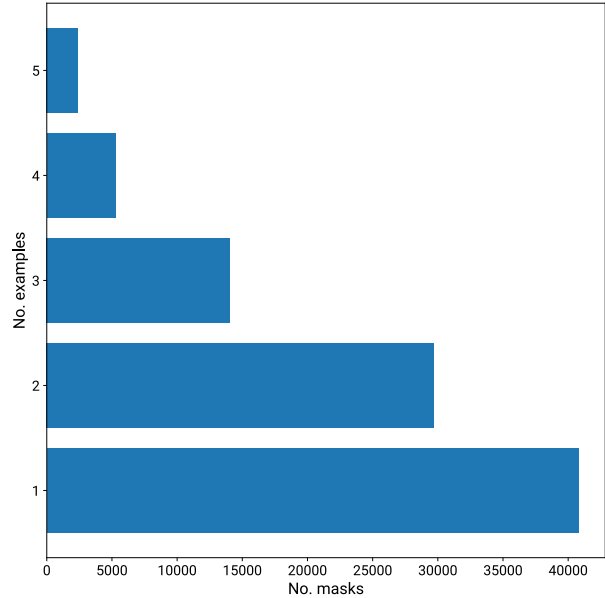

(b) No. of masks per example for training and testing.

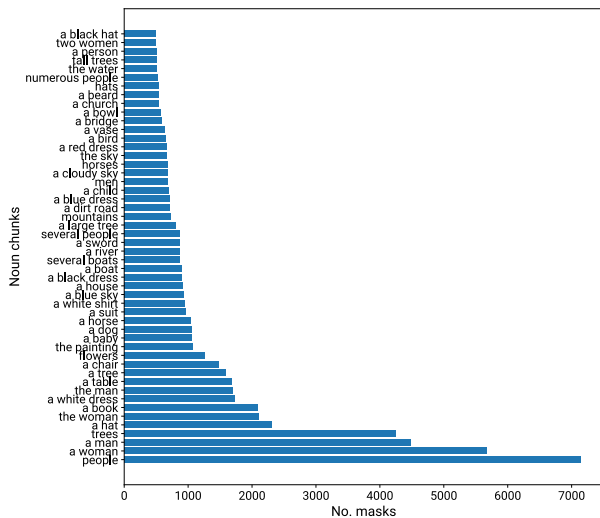

(c) Most common noun chunks.

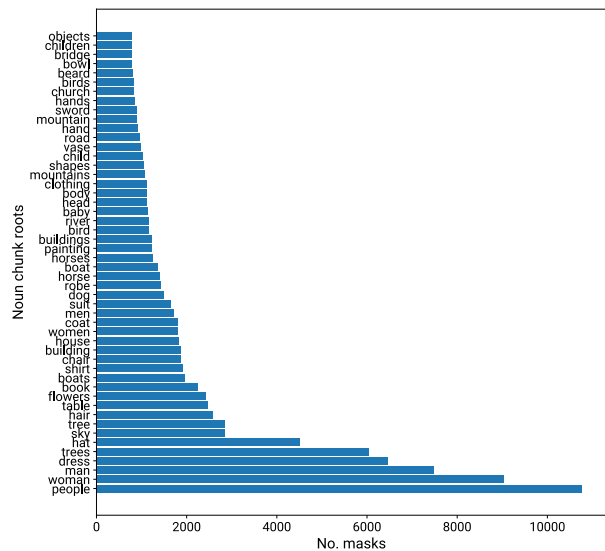

(d) Most common noun chunk roots.

Figure 3. Dataset statistics on the number of masks per example and the objects depicted in the masks (noun chunks).

ric for evaluating the inpainted regions. The results indicate that this metric aligns well with the assessment of prompt adherence in image inpainting tasks.

#### 4. Additional Qualitative Results

We provide additional qualitative results of our pipeline for prompt generation and multi-mask inpainting both on the DCI dataset (Fig. 6) and on the art dataset, over multiple numbers of inpainting masks (Figs. 7–11).

#### 5. Discussion on Potential Misuse

In the main paper, we introduced a new pipeline for inpainting multiple regions of an input image using different text prompts. This approach leverages MLLMs and diffusion models, which are currently state-of-the-art in text and image generation. As research advances, these models promise exciting opportunities for creating powerful tools like the one presented here. The results demonstrate that current technology is mature enough to enable MLLMs to interpret images across diverse domains, including complex

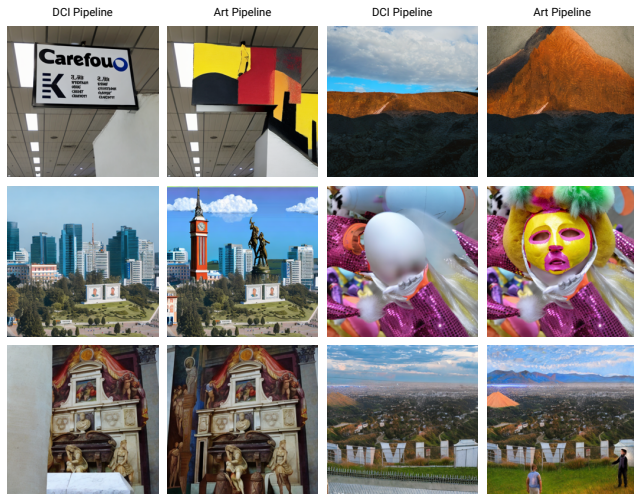

Figure 4. Domain transfer qualitative results.

| Image | Prompt                                                    | CLIPSim-T2I |
|-------|-----------------------------------------------------------|-------------|
|       | a padded image of a tower, with the sky in the background | <b>27.0</b> |
|       | a padded image of a tower                                 | 26.4        |
|       | a padded image of a tree                                  | 21.0        |
|       | a padded image of a car                                   | 19.7        |
|       | a padded image of a dog                                   | 19.3        |
|       | a padded image of a cat                                   | 18.2        |
|       | a padded image of five red flowers                        | <b>28.1</b> |
|       | a padded image of red flowers                             | 26.7        |
|       | a padded image of painted red flowers                     | 26.0        |
|       | a padded image of flowers                                 | 24.9        |
|       | a padded image of a tree                                  | 23.3        |
|       | a padded image of a dog                                   | 21.4        |

Figure 5. Visualization of our CLIPSim computation to evaluate inpainting prompt-following. By darkening and blurring the rest of the image, we obtain scores aligned to the region of interest.

areas such as artistic images, with high accuracy.

Looking ahead, it is anticipated that MLLMs will increasingly serve as invaluable assistants in various image-related tasks, such as image editing. While some limitations remain—for example, challenges in inpainting large and small areas or managing long prompts, which can sometimes result in noticeable artifacts—ongoing advancements in image generation are expected to continue enhancing these capabilities.

As the technology progresses, the distinction between real and generated images may become increasingly subtle, underscoring the need for innovation and caution. The proposed pipeline provides a practical tool for assisting users, including those with minimal experience in Generative AI, and has potential applications in automating processes such as data augmentation in computer vision. However, re-

membering the risks, including the accelerated generation of harmful content, is crucial. Therefore, as these tools are refined, it is equally important to develop more effective methods for distinguishing real images from generated ones, thereby helping to mitigate the risk of misuse and ensuring the integrity of digital content.

## References

- [1] Timo Lüddecke and Alexander Ecker. Image Segmentation Using Text and Image Prompts. In *Proceedings of the IEEE/CVF Conference on Computer Vision and Pattern Recognition*, pages 7086–7096, 2022.

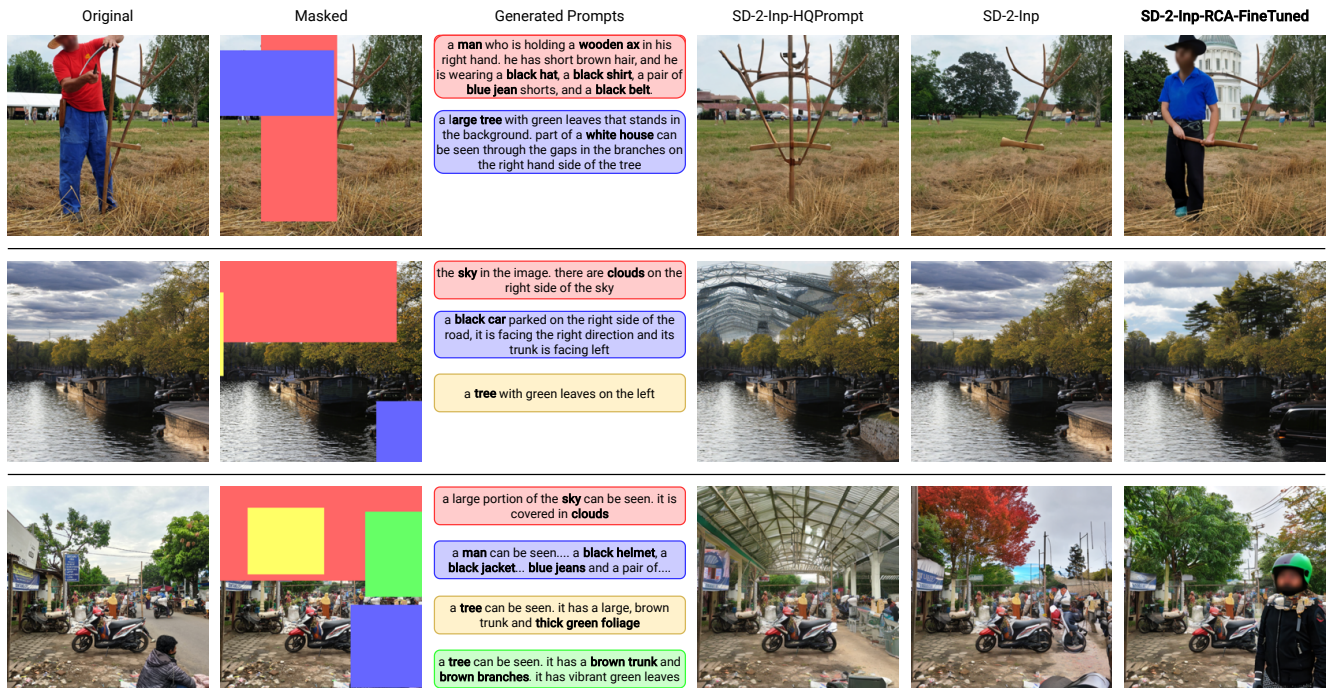

Figure 6. Additional qualitative results on the Densely Captioned Images dataset.

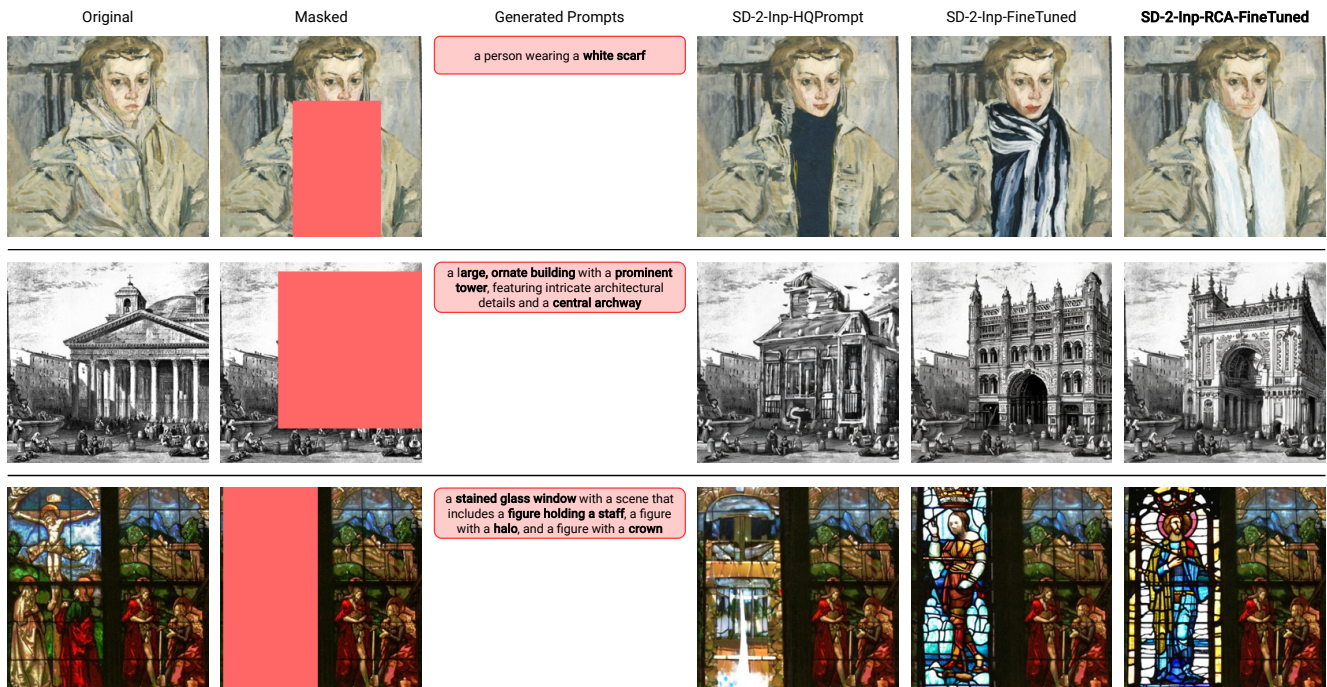

Figure 7. Additional qualitative results on the art dataset for 1-mask inpainting.

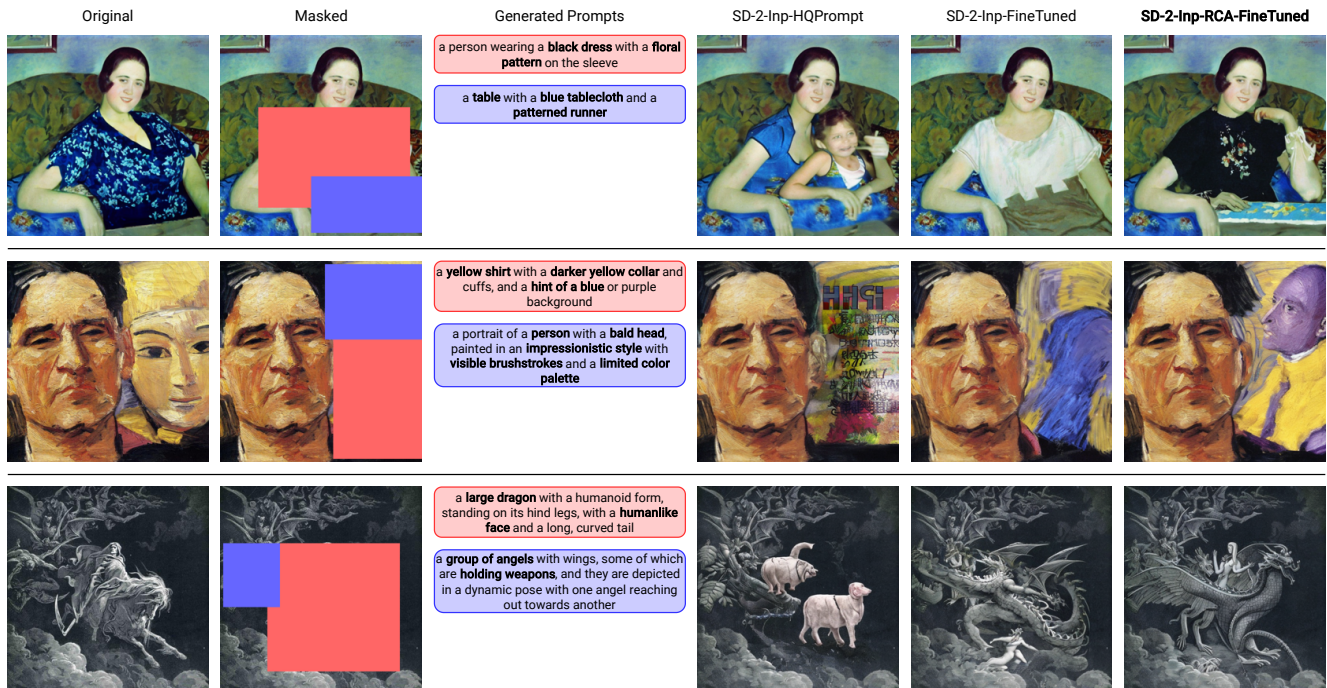

Figure 8. Additional qualitative results on the art dataset for 2-mask inpainting.

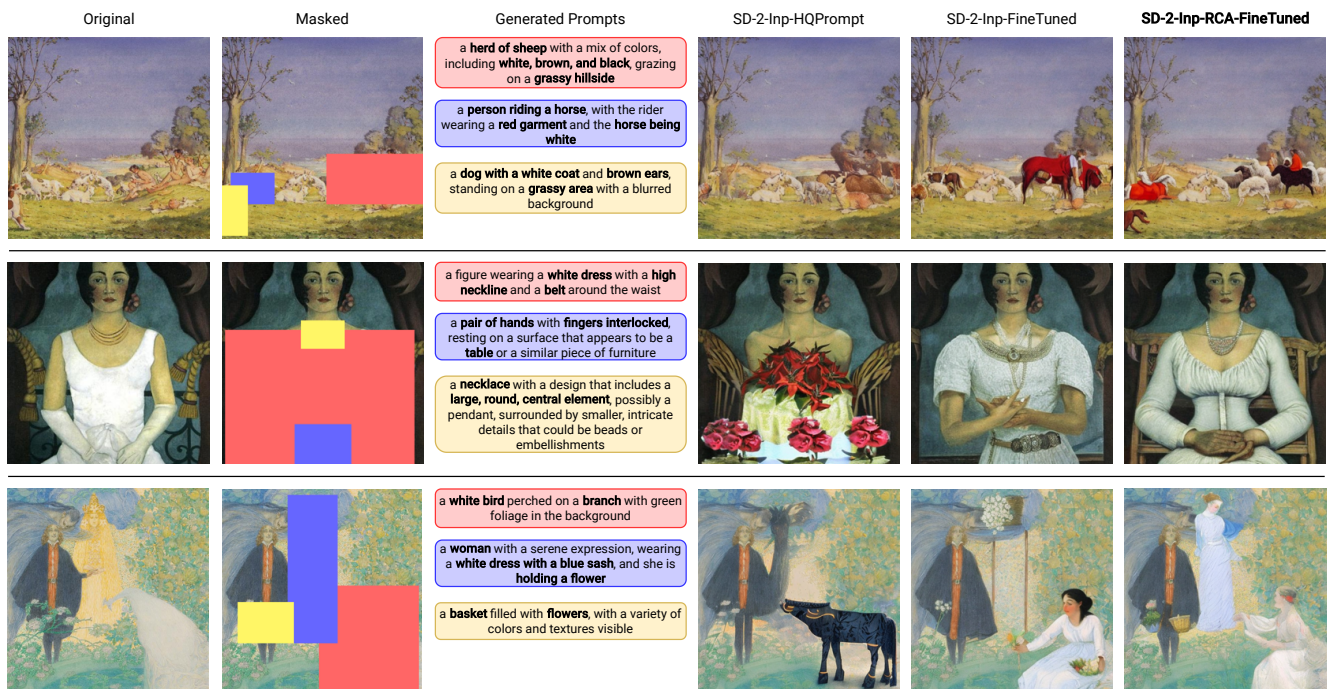

Figure 9. Additional qualitative results on the art dataset for 3-mask inpainting.

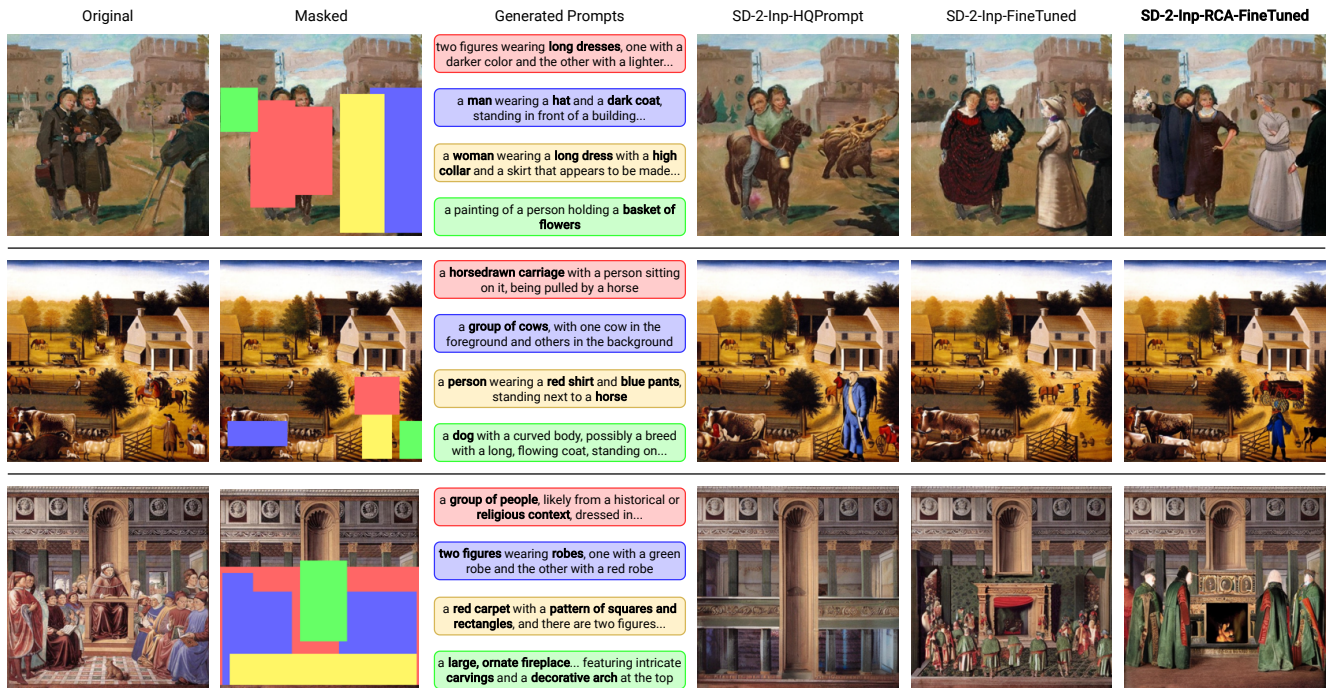

Figure 10. Additional qualitative results on the art dataset for 4-mask inpainting.

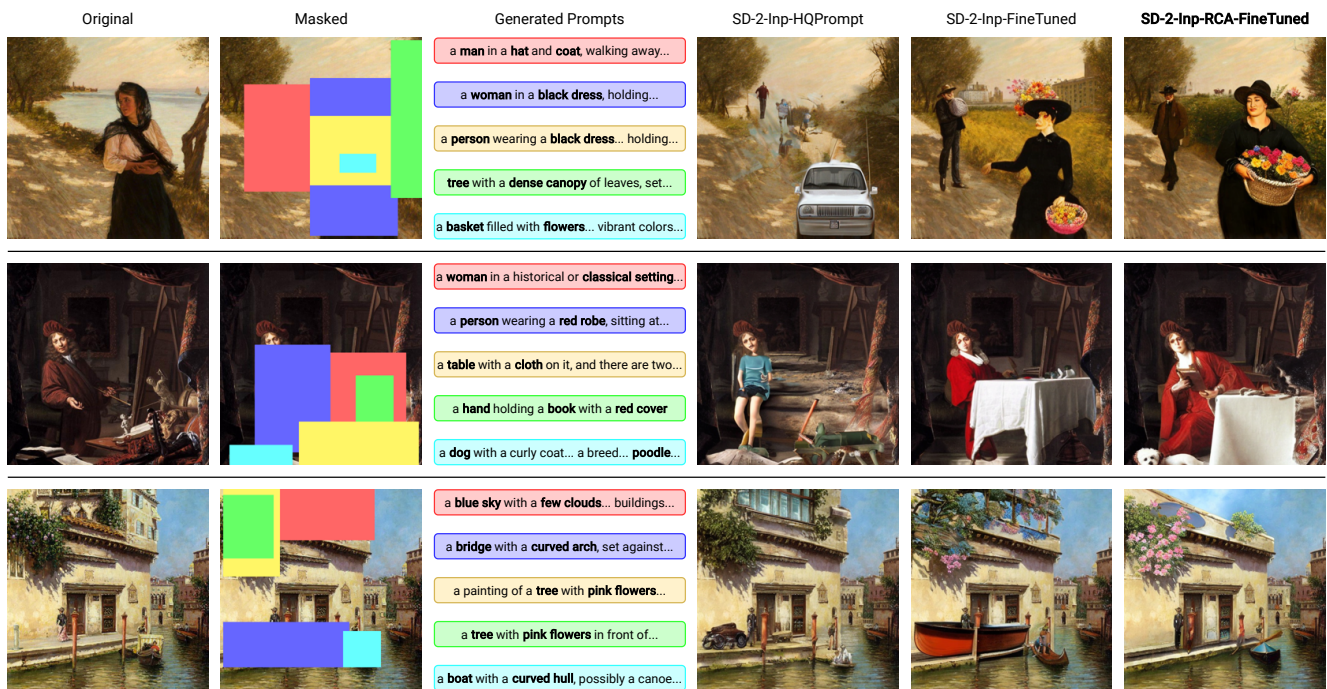

Figure 11. Additional qualitative results on the art dataset for 5-mask inpainting.
